# Supplementary material
Source: PubMed Central journal article supplement (PMC4753627)
Supplement: Supp_Data.pdf [file Supp_Data.pdf]

## Supplementary Data

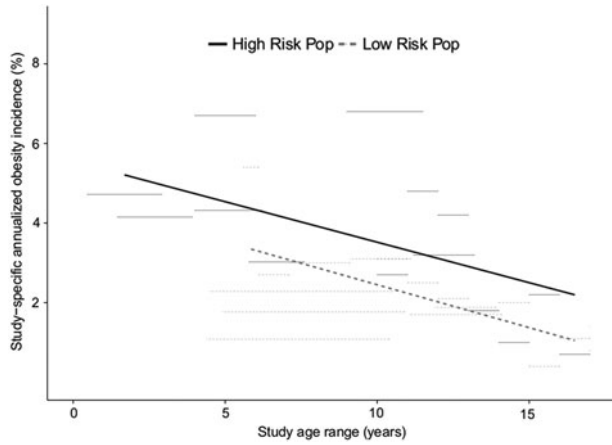

**Figure S1. Annual obesity incidence by age reported by 13 studies in the United States published during and after 2007.**
